# Supplementary material for: Astaxanthin: Past, Present, and Future
Source: MDPI journal article supplement (doi:10.3390/md21100514), 2023-09-28
Supplement: s1 [file s1]

### Supplementary Table S1.

**Supplementary Table S1.** Physical properties and main spectral data of astaxanthin

| Physical property                                                                                                                                                                                            | Description                                                                                                                                                                                                    |
|--------------------------------------------------------------------------------------------------------------------------------------------------------------------------------------------------------------|----------------------------------------------------------------------------------------------------------------------------------------------------------------------------------------------------------------|
| <b>Melting point</b>                                                                                                                                                                                         | 182—183°C(Recrystallized from acetone-petroleum ether)<br>215—216°C(Recrystallized from pyridine)                                                                                                              |
| <b>Solubility</b>                                                                                                                                                                                            | Easily soluble in CH <sub>3</sub> Cl, CH <sub>2</sub> Cl <sub>2</sub> , CCl <sub>4</sub> , DMSO, DHF, benzene and pyridine; soluble in acetone, EtOH and ether, slightly soluble in hexane; insoluble in water |
| <b>Visible absorption maxima (λ max )</b>                                                                                                                                                                    | 485 nm (in CH <sub>3</sub> Cl), 480 nm (in Acetone), 472 nm (EtOH), 472 nm (MeOH) and 466 nm (Hexane)                                                                                                          |
| <b>Circular dichroism (CD) spectrum</b>                                                                                                                                                                      | Shown in Supplementary Figure S2.                                                                                                                                                                              |
| <b>MS (Major ions in electron ionization mass spectra)</b>                                                                                                                                                   | m/z 596 [M] <sup>+</sup> (Relative intensity 20%), 580 (4%), 578 (10%), 504 (3%), 490 (3%), 106 (40%), 91 (100%)                                                                                               |
| <div> <div> <b>NMR</b> </div> <div> <b>Chemical shift (ppm) in CDCl<sub>3</sub> solution</b> </div> </div> <div> <div> <sup>1</sup>H-NMR            </div> <div> <sup>13</sup>C-NMR            </div> </div> |                                                                                                                                                                                                                |

# Supplementary Figure S1.

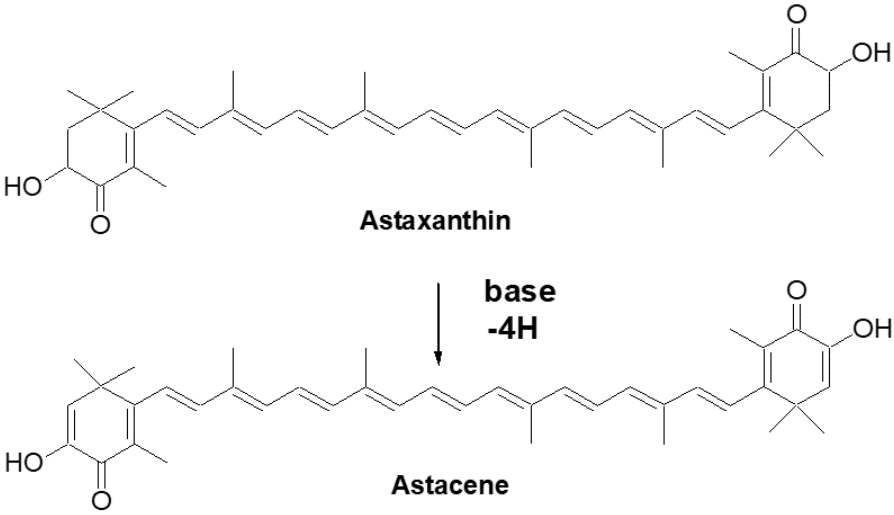

**Supplementary Figure S1.** Oxidation of astaxanthin to astacene in alkaline solution.

# Supplementary Figure S2.

(A)

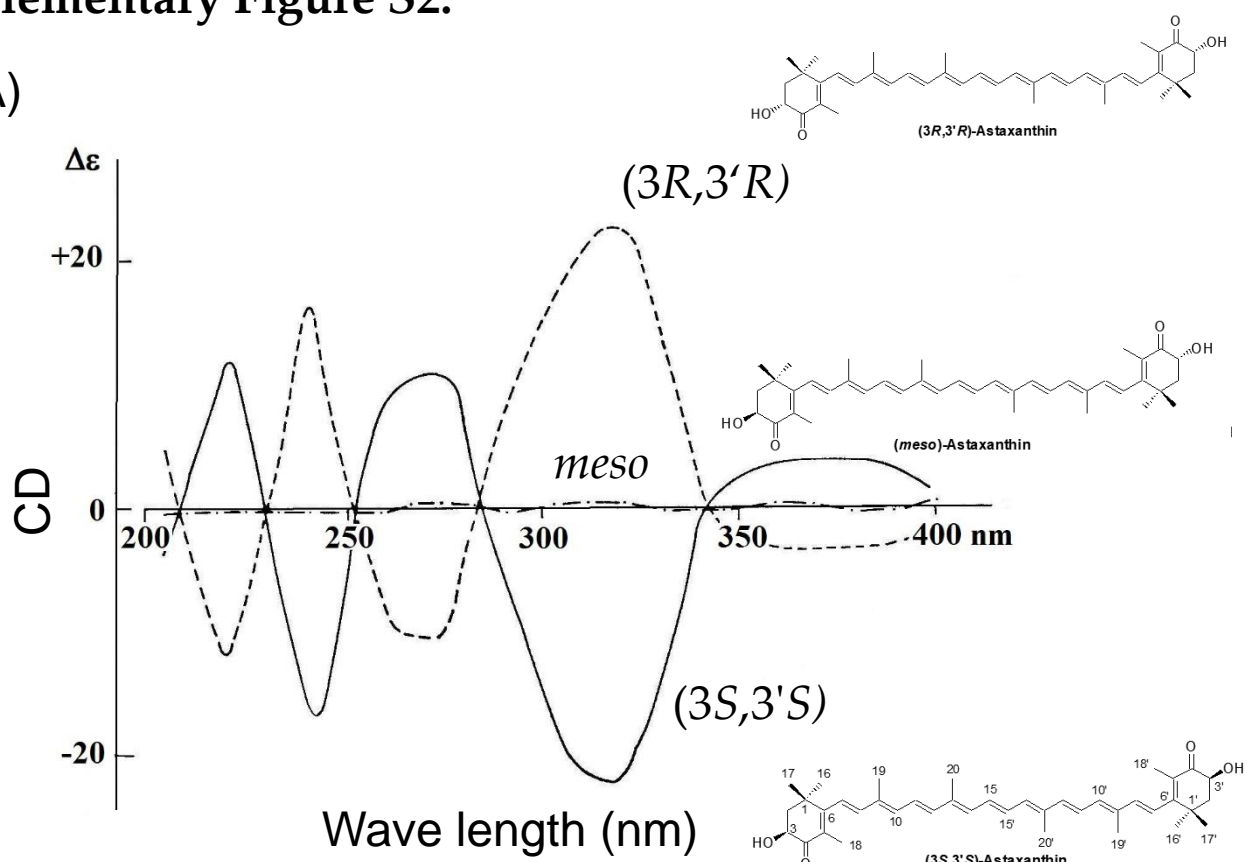

(B)

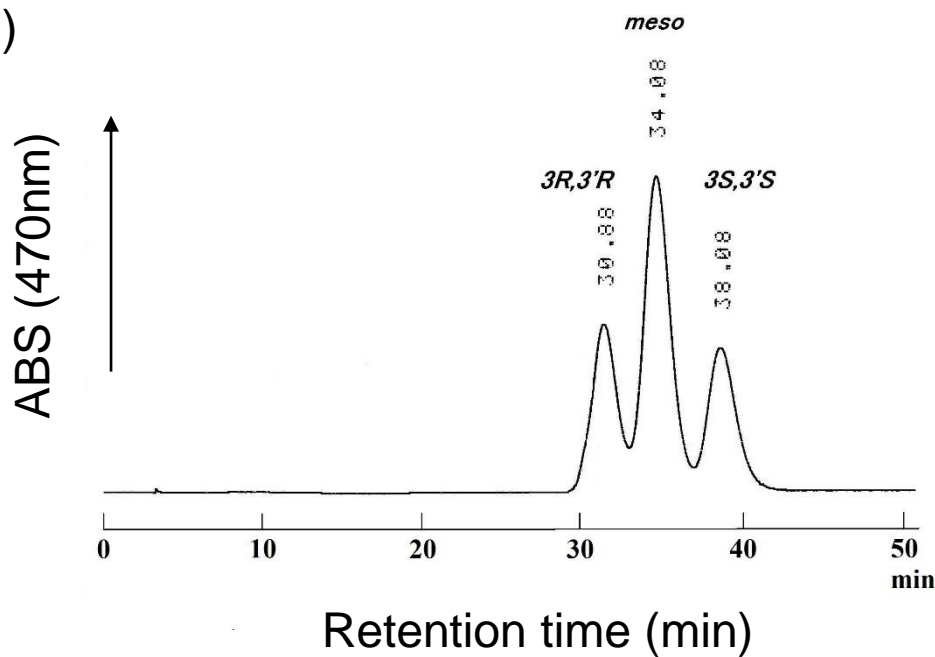

**Supplementary Figure S2.** Separation of optical isomers of astaxanthin (AX) .

(A) (3S,3'S)-AX (—), (3R,3'R)-AX (---), and CD spectra of *meso*-AX (— · —) in ether (measured at room temperature). (B) Separation of AX optical isomers by HPLC using an optical isomer separation column Sumichiral OA-2000 (Sumitomo Chemical, Japan); mobile phase *n*-hexane: CH<sub>3</sub>Cl; EtOH (48:16:0.1), flow rate 1.0 ml/min, detection by UV/VIS at 470 nm.

# Supplementary Table S3.

Supplementary Table S3. Characteristics of chromatophores on the integument of poikilotherm animals\*.

| Chromatophore                        | Melanophore/<br>Melanocyte                                             | Erythrophore**                                                                       | Xanthophore**                                                                        | Leucophore                                                      | Iridophore                                                                                  | Cyanophore                                                                               |
|--------------------------------------|------------------------------------------------------------------------|--------------------------------------------------------------------------------------|--------------------------------------------------------------------------------------|-----------------------------------------------------------------|---------------------------------------------------------------------------------------------|------------------------------------------------------------------------------------------|
| <u>Distribution</u>                  | Invertebrates to Vertebrates.<br>*Avian and Mammals: Melanocytes.      | Invertebrates to Heterothermic Vertebrates                                           | Invertebrates to Heterothermic Vertebrates                                           | Invertebrates to Heterothermic Vertebrates                      | Invertebrates to Heterothermic Vertebrates                                                  | Fishes very limited, only known 2 species of <i>Synchiropus</i> , family Callionymidae - |
| <u>Color</u>                         | Light Brown to Black                                                   | Orange to Red**                                                                      | Yellow to Orange**                                                                   | White                                                           | Iridescent/Silverly/ Blue/Green                                                             | Blue                                                                                     |
| <u>Chromatic Pattern/Chromophore</u> | <u>Pigmentary</u><br><br>Melanins (eumelanin/pheomelanin)              | <u>Pigmentary</u><br><br>Carotenoids*** /Pteridines                                  | <u>Pigmentary</u><br><br>Carotenoids*** /Pteridines                                  | <u>Structural</u><br><br>Cytoplasm, Purine/Colorless Pteridines | <u>Structural</u><br><br>Primary Guanine Platelet, Crystalline of Uric acid and Hypoxanthin | <u>?</u><br><br>Unknown                                                                  |
| <u>Spectral Properties</u>           | Absorptive/Approximately even across the visible spectrum (300–700 nm) | Absorptive/Combination of three pigments with $\lambda_{max}$ at 440, 467 and 477 nm | Absorptive/Combination of three pigments with $\lambda_{max}$ at 440, 467 and 477 nm | Reflective, Scatter/300–700 nm (especially in the UV range)     | Reflective/350–400 nm and 500–600 nm, Thin Film Interference                                | Unknown/Blue                                                                             |
| <u>Pigment Granule (Organelle)</u>   | Melanosome                                                             | Pterinosomes and Carotenoid Vesicles                                                 | Pterinosomes and Carotenoid Vesicles                                                 | Leucosome                                                       | Iridosome                                                                                   | Cyanosome                                                                                |
| <u>Form of Pigment Granule</u>       | Oval                                                                   | dendritic cells                                                                      | dendritic cells                                                                      | dendritic cells                                                 |                                                                                             | dendritic cells                                                                          |

\* This table was prepared based on the ref. [1,2,3,4].  
Note that information on dichromatic chromatophores was excluded from this table.  
\*\* The classification is based on their coloration, and the both are principally identical. The quantity and quality of carotenoids and pteridines present change the color of both.  
\*\*\*As carotenoids, xanthophores contain mainly xanthophylls such as lutein, zeaxanthin, and tunaxanthin, and red chromatophores contain mainly ketocarotenoids, including astaxanthin.

**Supplementary Figure S3.**

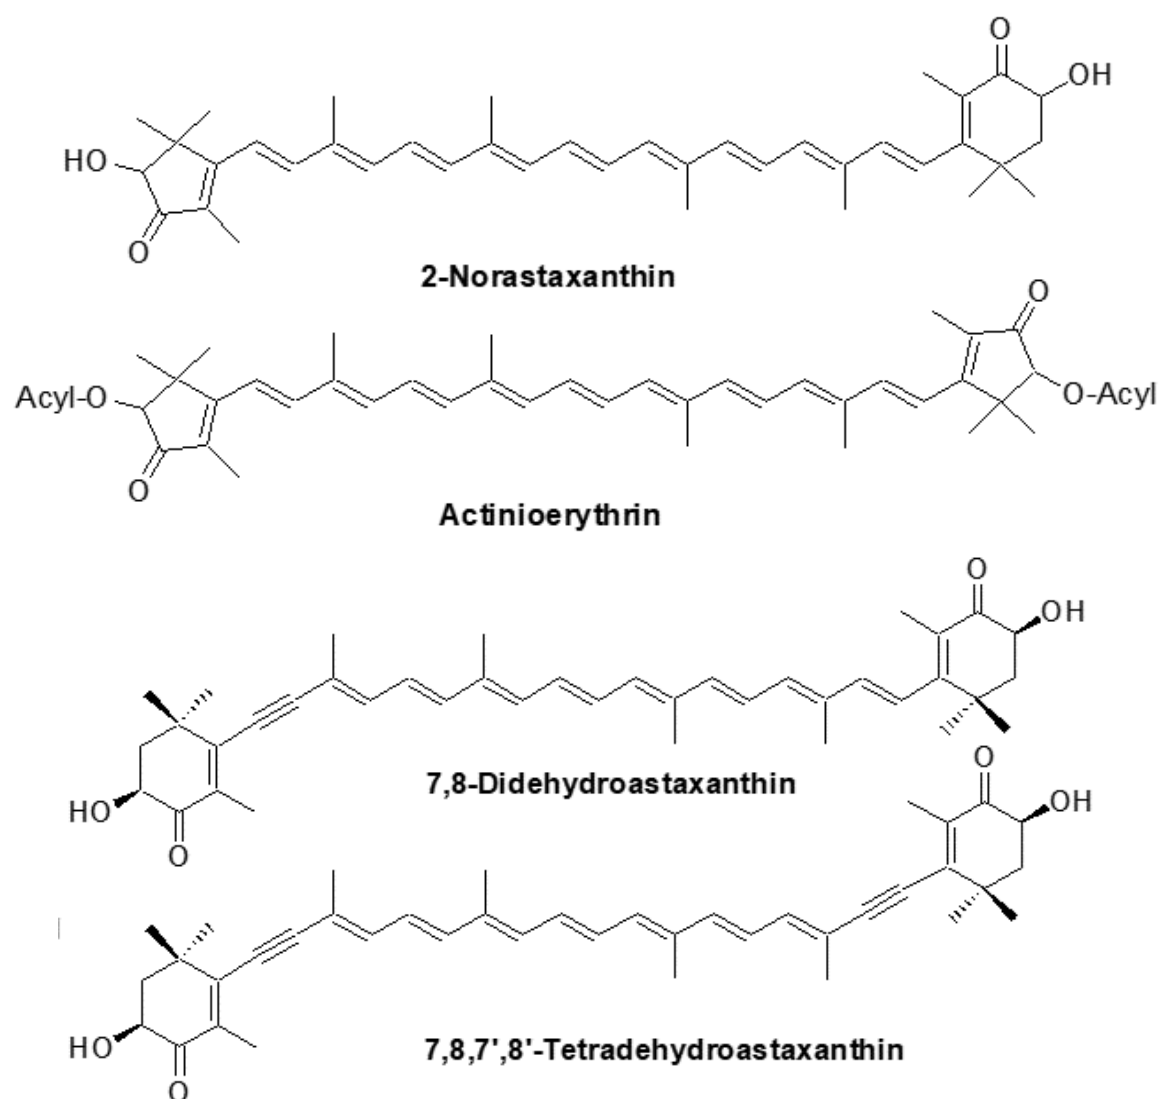

**Supplementary Figure S3.** Structure of astaxanthin analogues in marine invertebrates.

**Supplementary Figure S4.**

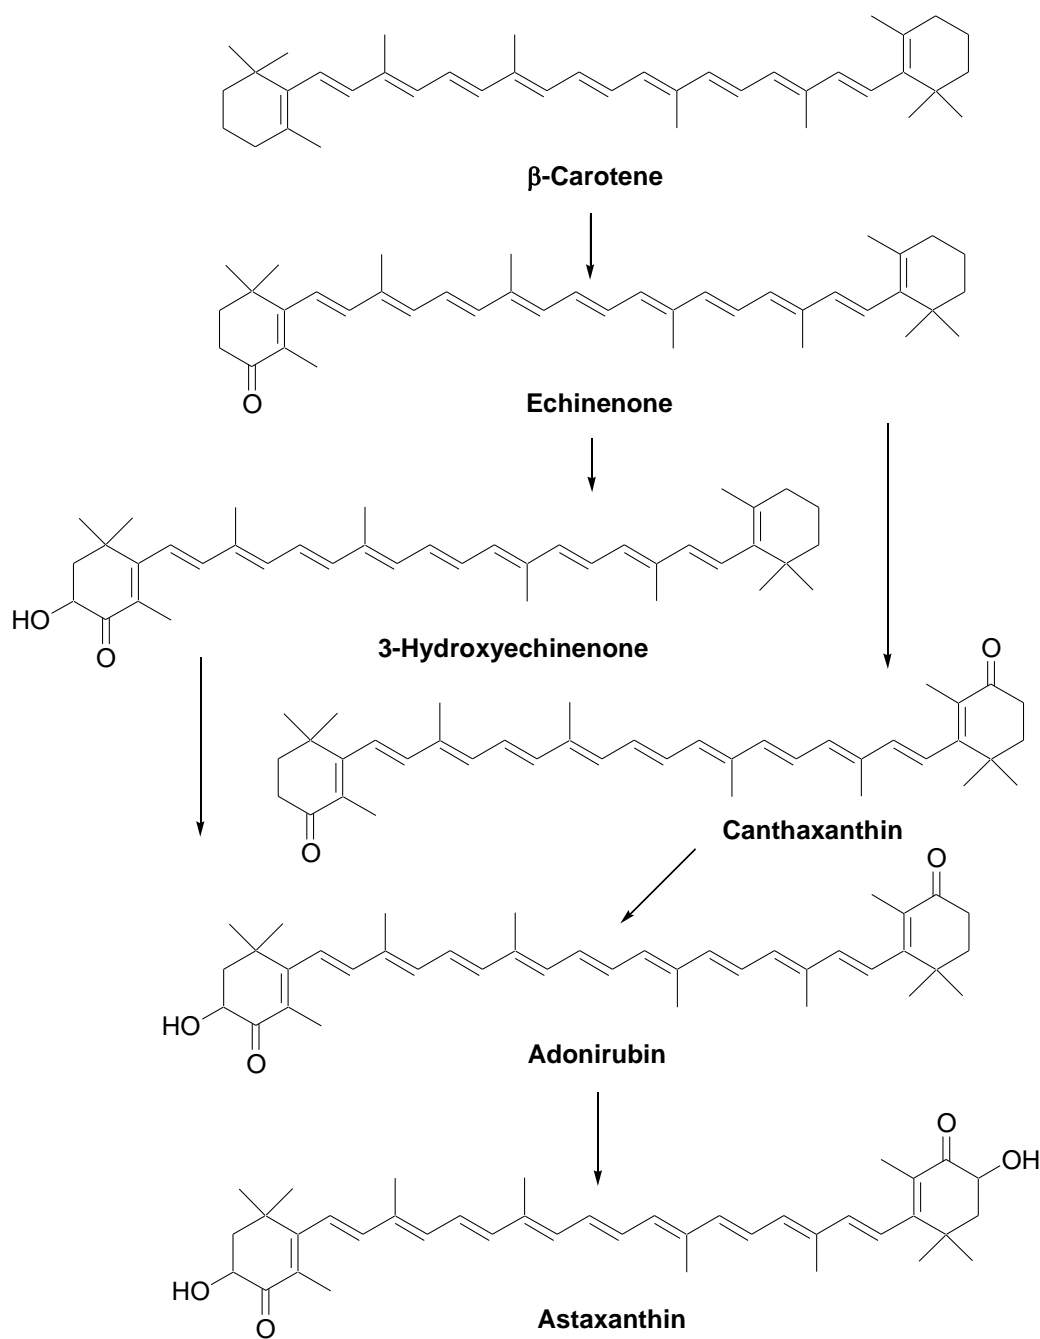

**Supplementary Figure S4.** oxidative bioconversion of  $\beta$ -carotene to astaxanthin in some animals.

**Supplementary Figure S5.**

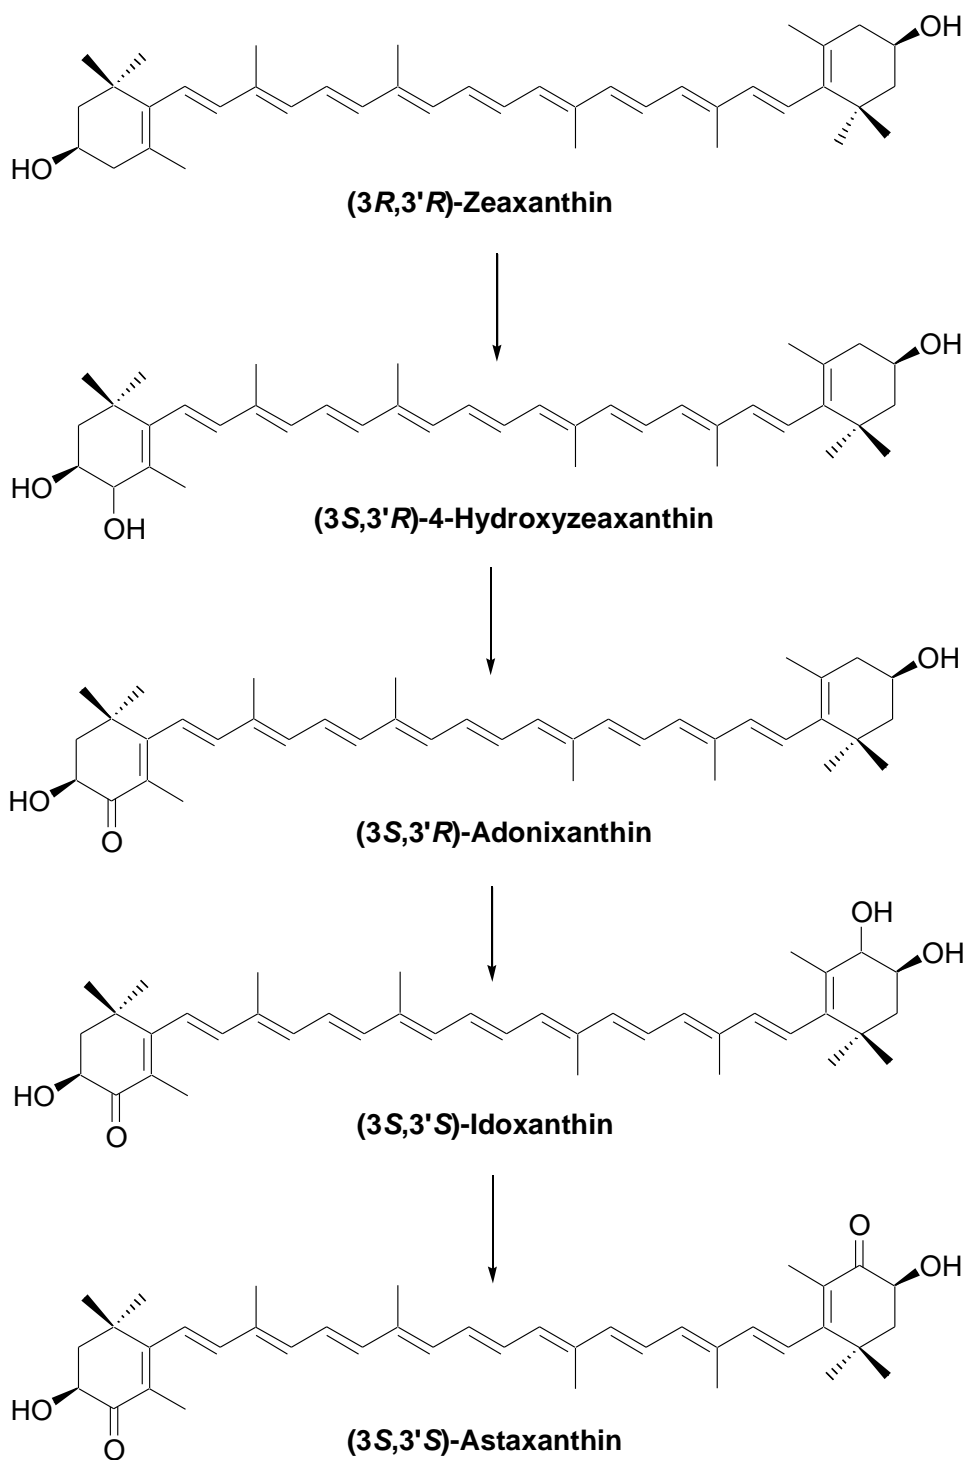

**Supplementary Figure S5.** Bioconversion of (3*R*,3'*R*)-zeaxanthin to astaxanthin in fishes of the family Cyprinidae.

**Supplementary Figure S6.**

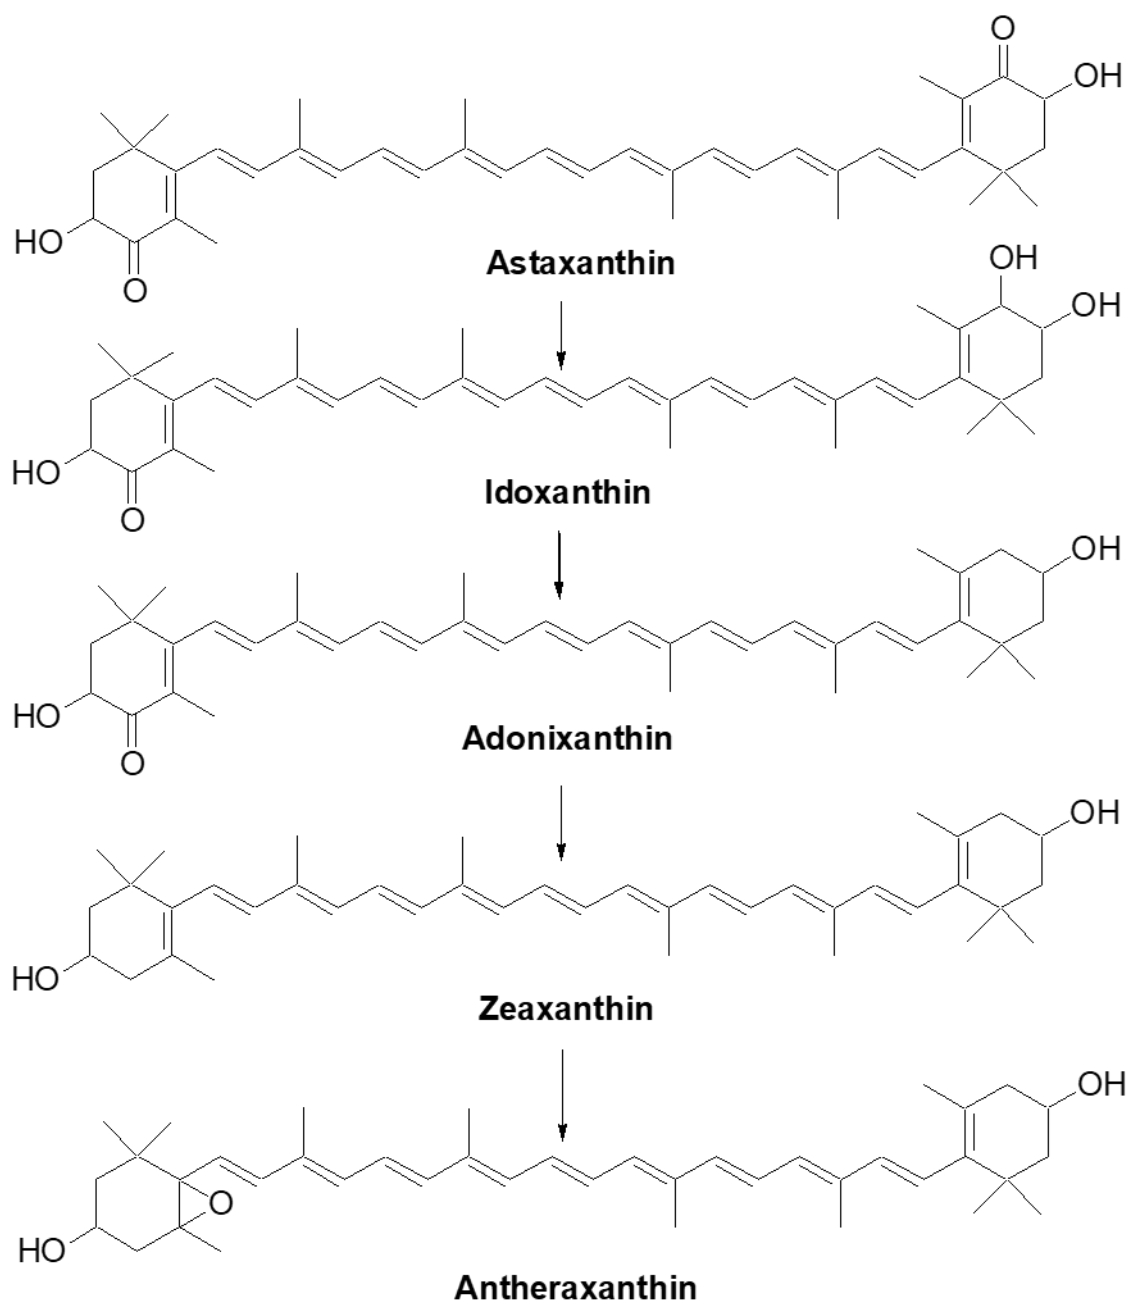

**Supplementary Figure S6.** Structure of astaxanthin analogues in marine invertebrates.



**Supplementary Figure S7.**

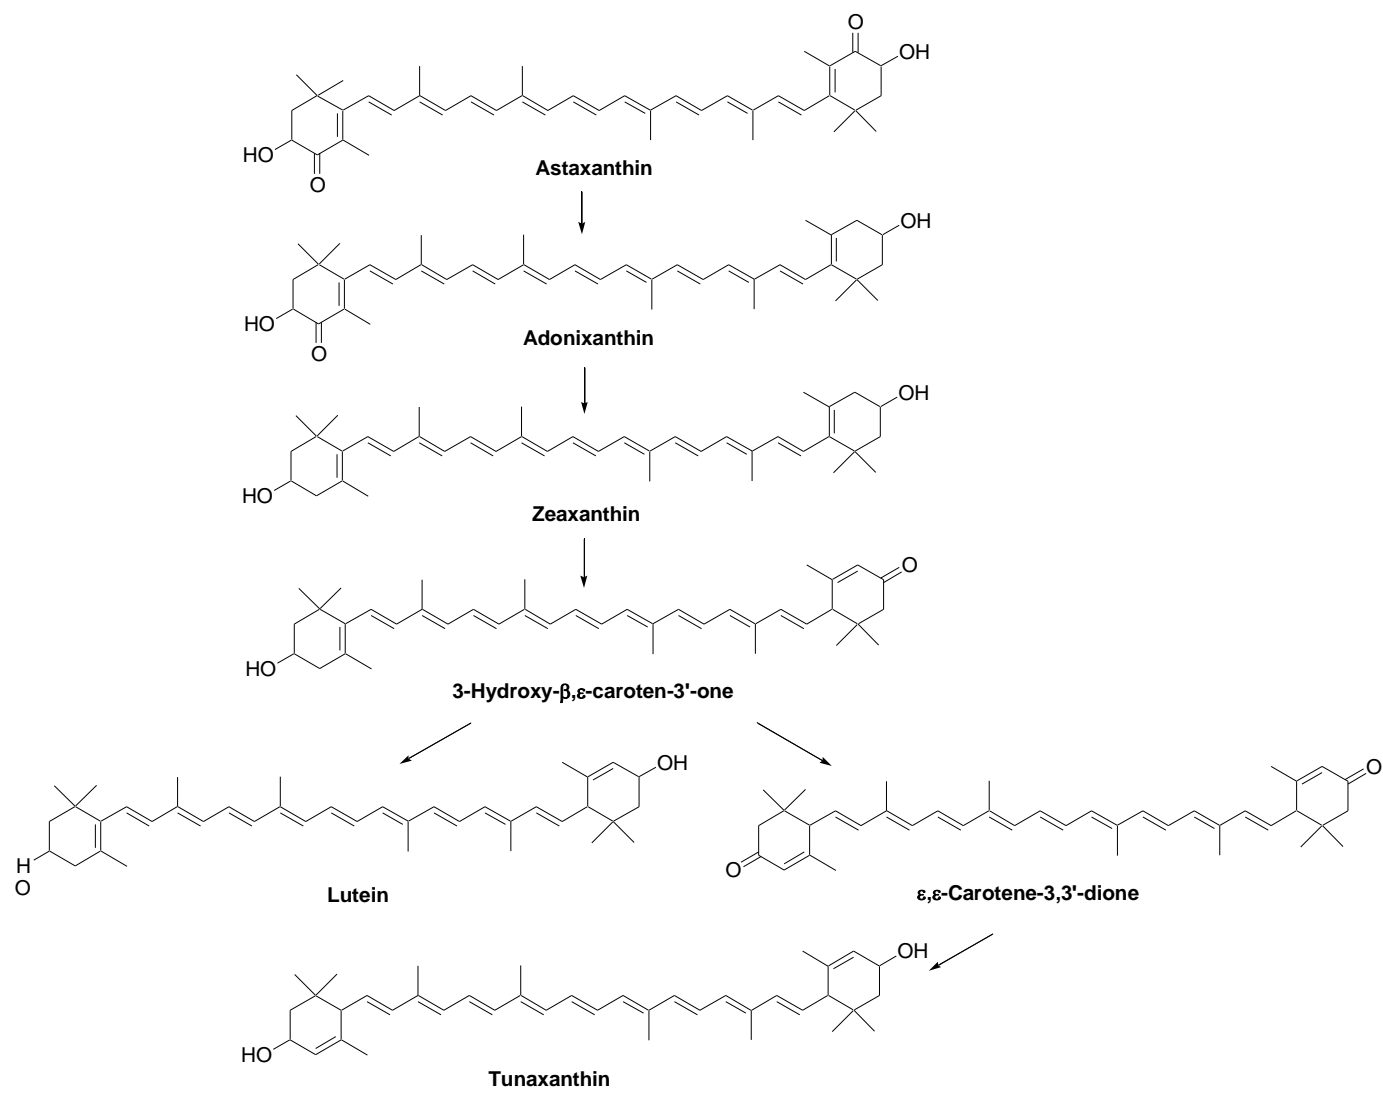

**Supplementary Figure S7.** Reductive metabolic pathway from astaxanthin to tunaxanthin in fishes.

## References

1. Akiyama, T.; Sasaki, M.; Tkneka, Y. Body color and pattern formations in animals: pigment cell development, genes and a reaction-diffusion model. *Hiyoshi Review of Natural Science Keio University (in Japanse)* **2005**, *37*, 73-94.
2. Schartl, M.; Larue, L.; Goda, M.; Bosenberg, M.W.; Hashimoto, H.; Kelsh, R.N. What is a vertebrate pigment cell? *Pigment Cell Melanoma Res* **2016**, *29*, 8-14, doi:10.1111/pcmr.12409.
3. Kelley, J.L.; Davies, W.I.L. The Biological Mechanisms and Behavioral Functions of Opsin-Based Light Detection by the Skin. *Frontiers in Ecology and Evolution* **2016**, *4*, doi:10.3389/fevo.2016.00106.
4. Goda, M.; Fujii, R. Blue chromatophores in two species of callionymid fish. *Zoological science* **1995**, *12*, 811-813.
