# Supplementary material for: Astaxanthin: Past, Present, and Future
Source: MDPI journal article supplement (doi:10.3390/md21100514), 2023-09-28
Supplement: s1 [file s1]

**Supplementary Table S2.** Singlet oxygen ( $^1\text{O}_2$ ) quenching activity of common carotenoids [ $k(10^9\text{M}^{-1}\text{s}^{-1})$ ]

| <sup>1</sup> O <sub>2</sub> generator |            |     | EDN                 |                    |                   | EDN               |                     | NDPO <sub>2</sub> |                        | Phenazine                    |                                          |         | EP                 |
|---------------------------------------|------------|-----|---------------------|--------------------|-------------------|-------------------|---------------------|-------------------|------------------------|------------------------------|------------------------------------------|---------|--------------------|
| Reference                             |            |     | [1]                 |                    |                   | [2]               |                     | [3]               | [4]                    | [5]                          | [6]                                      | [7]     |                    |
| Method                                |            |     | TD*                 |                    |                   | TD*               |                     | TD*               |                        | Photosensitizing/pulse laser |                                          |         | TD*                |
| Detection                             |            |     | Luminescence        |                    |                   | Luminescence      |                     | Luminescence      |                        | Luminescence                 |                                          |         | Absorbance of DPBF |
| Solvent                               |            |     | CDCl <sub>3</sub> / |                    |                   | DMF/              | CDCl <sub>3</sub> / |                   | EtOH/CHCl <sub>3</sub> |                              | EtOH/CHCl <sub>3</sub> /D <sub>2</sub> O |         |                    |
| Carotenoid                            | <i>n</i> * | -OH | CDCl <sub>3</sub>   | CD <sub>3</sub> OD | CDCl <sub>3</sub> | CDCl <sub>3</sub> | CD <sub>3</sub> OD  | /D <sub>2</sub> O |                        | Benzene                      | Toluene                                  | Benzene | (50:50:1)          |
|                                       |            |     |                     | (2:1)              | (9:1)             |                   | (2:1)               | (50:50:1)         |                        |                              |                                          |         |                    |
| <i>Dodecapreno-β-carotene</i>         | 19         | 0   | -                   | -                  | -                 | -                 | -                   | -                 | -                      | 23                           | 29                                       | -       | -                  |
| <i>Decapreno-β-carotene</i>           | 15         | 0   | -                   | -                  | -                 | -                 | -                   | 13.3              | -                      | 20                           | 21.0                                     | -       | -                  |
| <i>C50-Astaxanthin</i>                | 15+2       | 2   |                     |                    |                   |                   |                     | 13.0              | -                      | -                            | -                                        | -       | -                  |
| <u>Astaxanthin (AX)</u>               | 11+2       | 2   | 2.2                 | 1.8                | 5.4               | 2.2               | 1.8                 | 9.0               | 24                     | 14                           | -                                        |         | 11.7               |
| Adonirubin                            | 11+2       | 1   | -                   | -                  | -                 | -                 | -                   | -                 | -                      | -                            | -                                        | 10.4    | -                  |
| Anonixanthin                          | 11+1       | 2   | -                   | -                  | -                 | -                 | -                   | -                 | -                      | -                            | -                                        | 12.3    | -                  |
| Canthaxanthin                         | 11+2       | 0   | 2.2                 | 1.3                | 2.0               | -                 | 1.2                 | 10.2              | 21                     | -                            | 13                                       | -       | -                  |
| Zeaxanthin                            | 11         | 2   | 2.0                 | 0.73               | 3.4               | 1.9               | 0.12                | -                 | 10                     | 12                           | -                                        | -       | 11.2               |
| β-Cryptoxanthin                       | 11         | 1   | 2.0                 | 0.27               | 1.7               | -                 | -                   | -                 | 6                      | -                            | -                                        | -       | 7.0                |

|                                           |       |     |      |        |       |      |       |     |      |     |     |      |      |
|-------------------------------------------|-------|-----|------|--------|-------|------|-------|-----|------|-----|-----|------|------|
| <i>all-trans</i><br><b>β-Carotene</b>     | 11    | 0   | 2.2  | 0.28   | 1.1   | 2.2  | 0.049 | 8.4 | 14   | 13  | 14  | -    | 10.8 |
| <i>9-cis</i> β-<br><b>Carotene</b>        | 11    | 0   | -    | -      | -     | -    | -     | -   | -    | 11  | 9   | -    | -    |
| <i>15-cis</i> β-<br><b>Carotene</b>       | 11    | 0   | -    | -      | -     | -    | -     | -   | -    | 11  | 12  | -    | -    |
| <b>Lycopene</b>                           | 11    | 0   | 3.0  | 1.4    | 3.4   | -    | -     | 8.8 | 31   | 17  | -   | -    | 14.0 |
| <b>Capsanthin</b>                         | 10+1  | 2   |      |        |       |      |       | -   |      | -   | -   | -    | 12.1 |
| <b>Lutein</b>                             | 10    | 2   | 0.61 | 0.26   | 2.1   | 0.8  | -     | -   | 8    | 16  | -   | 6.64 | 8.1  |
| <b>α-Carotene</b>                         | 10    | 0   | 0.66 | 0.23   | 0.93  | -    | -     | -   | 19   | -   | 8.2 | -    | 10.0 |
| <b>Capsorbin</b>                          | 9+2   | 2   | -    | -      | -     | -    | -     | -   | -    | -   | -   | 12   | -    |
| <b>Fucoxanthin</b>                        | 9+1   | 2   | 0.29 | 0.075  | 0.97  | -    | 0.005 | -   | -    | -   | -   | -    | -    |
| <b>Tunaxanthin</b>                        | 9     | 2   | -    | -      | -     | 0.15 | -     | -   | -    | -   | -   | -    | -    |
| <b>Violaxanthin</b>                       | 9     | 2   | -    | -      | -     | -    | -     | -   | -    | 16  | -   | -    | -    |
| <i>Septapreno-β-</i><br><b>Carotene</b>   | 9     | 0   | -    | -      | -     | -    | -     | -   | -    | -   | -   | 1.38 | -    |
| <i>Bixin</i>                              | 9(+2) | 0   | -    | -      | -     | -    | -     | -   | -    | 9.2 | -   | -    | -    |
| <i>7,7'-Dihydro-β-</i><br><b>Carotene</b> | 8     | 0   | -    | -      | -     | -    | -     | -   | -    | -   | -   | 0.3  | -    |
| <b>α-Tocopherol</b>                       | N/A   | N/A | 0.02 | 0.0039 | 0.049 | -    | -     | -   | 0.28 | -   | -   | -    | 0.13 |

\*Numbers were given as number of conjugation length of C=C(+C=O) of each carotenoid.

EDN, 1,4-dimethylnaphthalene endoperoxide; NDPO2, of 3,3'-(1,4-naphthylene)dipropionate endoperoxide; EP, 1-methylnaphthalene-4-

propionate endoperoxide; DPBF, 1,3-diphenylisobenzofuran; DMF, N,N-dimethylformamide.

## **References**

1. Nishida, Y.; Yamashita, E.; Miki, W. Quenching activities of common hydrophilic and lipophilic antioxidants against singlet oxygen using chemiluminescence detection system. *Carotenoid Science* **2007**, *11*, 16-20.
2. Shimidzu, N.; Goto, M.; Miki, W. Carotenoids as Singlet Oxygen Quenchers in Marine Organisms. *Fisheries science* **1996**, *62*, 134-137, doi:10.2331/fishsci.62.134.
3. Baltschun, D.; Beutner, S.; Briviba, K.; Martin, H.-D.; Paust, J.; Peters, M.; Röver, S.; Sies, H.; Stahl, W.; Steigel, A.; et al. Singlet Oxygen Quenching Abilities of Carotenoids. *Liebigs Annalen* **1997**, *1997*, 1887-1893, doi:10.1002/jlac.199719970913.
4. Di Mascio, P.; Kaiser, S.; Sies, H. Lycopene as the most efficient biological carotenoid singlet oxygen quencher. *Arch Biochem Biophys* **1989**, *274*, 532-538, doi:10.1016/0003-9861(89)90467-0.
5. Conn, P.F.; Schalch, W.; Truscott, T.G. The singlet oxygen and carotenoid interaction. *J Photochem Photobiol B* **1991**, *11*, 41-47, doi:10.1016/1011-1344(91)80266-k.
6. Edge, R.; Truscott, T.G.; Landrum, J.T.e. *Carotenoids: Physical, Chemical, and Biological Functions and Properties*; Taylor & Francis: 2009.
7. Mukai, K. Antioxidant Activity of Foods: Development of Singlet Oxygen Absorption Capacity (SOAC) Assay Method. *J Nutr Sci Vitaminol (Tokyo)* **2019**, *65*, 285-302, doi:10.3177/jnsv.65.285.
