# Supplementary material for: Astaxanthin: Past, Present, and Future
Source: MDPI journal article supplement (doi:10.3390/md21100514), 2023-09-28
Supplement: s1 [file s1]

**Supplementary Table S5.** Astaxanthin. Update on the Efficacy of Topical Use in Human Clinical Trials.

| Author/year/<br>reference                          | Study design                                                           | Subjects                                                                               | Dose <sup>#</sup>                                                      | Duration | Outcome <sup>†</sup>                                           | Description                                                                                                                                                                                                                                                                                                                                                                                                                                                                                                                                                                                                                                                                                                        |
|----------------------------------------------------|------------------------------------------------------------------------|----------------------------------------------------------------------------------------|------------------------------------------------------------------------|----------|----------------------------------------------------------------|--------------------------------------------------------------------------------------------------------------------------------------------------------------------------------------------------------------------------------------------------------------------------------------------------------------------------------------------------------------------------------------------------------------------------------------------------------------------------------------------------------------------------------------------------------------------------------------------------------------------------------------------------------------------------------------------------------------------|
| Kosyreva TF. <i>et al.</i> ,<br>2022 [1]           | 3 arms<br>quasi-<br>experimental<br>prospective<br>study               | 105 patients<br>with partial<br>adentia aged 30-<br>65 yrs.;                           | 0.026%<br>in gel*                                                      | 7 days   | ✓ Dental health                                                | The main group ( $n=35$ ) received astaxanthin (AX) gel within 7 days after the placement of the removable denture. The patients in the comparison group ( $n=35$ ) did not receive AX gel after the placement of the removable denture. The control group ( $n=25$ ) did not receive any prophylactic agents and did not have removable dentures. In patients with immediate and partial dentures, the preventive and anti-inflammatory effects of AX gel were confirmed: the use of the gel for 7 days reduced hygiene indicators, bacterial plasmalogens and endotoxin levels in the oral fluid from a short-term perspective.<br><u>No safety concerns were identified in this study.</u> [Article in Russian] |
| Trakanwittayarak<br>S, Meephansan J.<br>2019 [2]   | Placebo-<br>controlled<br>repeated<br>measured<br>prospective<br>study | 13 volunteers<br>with allergy<br>associated with<br><i>p</i> -<br>phenylenediami<br>ne | 0.07% AX<br>emulsion                                                   | 7 days   | ✓ Allergic<br>contact dermatitis<br>( <i>p</i> -phenylenedia.) | On Day 2, pretreatment with AX emulsion resulted in a reaction in 5 of 12 patients ( $p = 0.025$ ). On Day 7, pretreatment of skin sites with AX reduced the cutaneous allergic reaction to <i>p</i> -phenylenediamine in 2 of 12 patients ( $p = 0.046$ ) as compared with skin treated with AX-free emulsion.<br><u>There were no serious adverse effects with patch test.</u>                                                                                                                                                                                                                                                                                                                                   |
| Tominaga K. <i>et al.</i><br>2012 [3]<br>(Study 1) | Open-labeled,<br>prospective<br>study                                  | 30 healthy<br>females<br>(22-55 yrs.)                                                  | 78.9 $\mu$ M<br>AX<br>solution<br>(1mL/day)<br>and<br>6 mg/day<br>p.o. | 8 weeks  | ✓ Skin health                                                  | Combined dosing study with oral intake (p.o.) and topical application.<br><u>Age spot (left cheek)</u> : significantly improved after treatment.<br><u>Wrinkle depth (left eye corner)</u> : significantly improved in several parameters after treatment.<br><u>Elasticity (left eye corner)</u> : significantly improved after treatment. <u>Texture (left cheek)</u> : significantly improved after treatment. <u>Moisture content (left cheek)</u> : Not significant (N.S.)<br><br><u>No safety concerns were identified in this study.</u>                                                                                                                                                                    |

|                                                                                      |                                       |                                          |                                         |          |        |                         |                                                                                                                                                                                                                                                                                                                                                                                                                                       |
|--------------------------------------------------------------------------------------|---------------------------------------|------------------------------------------|-----------------------------------------|----------|--------|-------------------------|---------------------------------------------------------------------------------------------------------------------------------------------------------------------------------------------------------------------------------------------------------------------------------------------------------------------------------------------------------------------------------------------------------------------------------------|
| Seki T. <i>et al.</i> ,<br>2001 [4]<br>Study 2<br>(Primary skin<br>irritation test.) | Open-labeled,<br>prospective<br>study | 45 healthy<br>subjects                   | 5% oil,<br>0, 0.7mg/g<br>in cream       | 48 hours | ✓<br>✓ | Skin health<br>(Safety) | A few people in each group showed weak primary irritation, but this was not significantly different from the base product - judged to be safe products.                                                                                                                                                                                                                                                                               |
| Seki T. <i>et al.</i> ,<br>2001 [4]<br>Study 2<br>(repeated<br>application)          | Open-labeled,<br>prospective<br>study | 11 healthy<br>subjects<br>(Mean 35 yrs.) | 0.7mg/g in<br>cream<br>(20mg,<br>b.i.d) | 3 weeks  | ✓<br>✓ | Skin health<br>(Safety) | <u>Water content</u> (left eye corner): significantly improved. <u>Inspection by dermatologist</u> : partially effective for chloasma and senile pigment spot. <u>Subjective symptoms (visual analogue scale: VAS)</u> : improvement trend in dryness, flushing, poor make-up application, itching and eczema.<br><br><u>No serious adverse effects were identified in this study.</u>                                                |
| Seki T. <i>et al.</i> ,<br>2001 [4]<br>Study 2                                       | Open-labeled,<br>prospective<br>study | 3 healthy<br>females<br>(Mean 33 yrs.)   | 0.7mg/g in<br>cream<br>(20mg,<br>b.i.d) | 2 weeks  | ✓      | Skin health             | <u>Inspection/Palpation by dermatologist</u> : improvement trend in wrinkles<br><u>Wrinkle depth</u> (left eye corner): improvement trend<br><u>Moisture and sebum content (left and right eye corner, left and right cheeks)</u> : trend towards improvement in terms of moisture content.<br><u>No serious adverse effects were identified in this study.</u>                                                                       |
| Yamashita E.<br>1995 [5]                                                             | Open-labeled,<br>prospective<br>study | 7 male subjects<br>(Skin type III)       | ODT                                     | 24 hour  | ✓      | Skin health             | <i>AX were derived from krill and synthetic product. AXs were applies by Occlusive Dressing Technique (ODT) for 24 hours. The areas of ODT were then wiped with alcohol, irradiated with 2 MED UVB and observed for erythema and hyperpigmentation up to 1 week.</i><br>Topical astaxanthin from krill suppressed of post-UVB erythema and hyperpigmentation.<br><br><u>No serious adverse effects were identified in this study.</u> |

## Reference:

1. Kosyreva, T.F.; Samoylova, M.B.; Voeykova, O.V.; Belfer, M.L.; Zatevalov, A.M.; Voropayeva, E.A.; Zhilenkova, O.G. The effect of astaxanthin on the adaptation of the oral mucosa to a removable denture. *Stomatologiya (Mosk)* [in Russian] **2022**, *101*, 17-22, doi:10.17116/stomat202210101117.
2. Trakanwittayarak, S.; Meephansan, J. The effect of astaxanthin on allergic contact dermatitis in response to hair dye containing p-phenylenediamine. *Eur J Dermatol* **2019**, *29*, 647-648, doi:10.1684/ejd.2019.3654.
3. Tominaga, K.; Hongo, N.; Karato, M.; Yamashita, E. Cosmetic benefits of astaxanthin on humans subjects. *Acta Biochim Pol* **2012**, *59*, 43-47.
4. Seki, T.; Sueki, H.; Kono, H.; Suganuma, K.; Yamashita, E. Effects of astaxanthin from *Haematococcus pluvialis* on human skin-patch test; skin repeated application test; effect on wrinkle reduction. *Fragrance J* **2001**, *12*, 98-103.
5. Yamashita, E. Suppression of post-UVB hyperpigmentation. *Fragrance J* [in Japanese] **1995**, *14*, 180-185.
